# Supplementary material for: Variation in post-colonoscopy colorectal cancer across colonoscopy providers in English National Health Service: population based cohort study
Source: PubMed Central journal article supplement (PMC6849511; doi:10.1136/bmj.l6090), 2019-11-13
Supplement: burn051410.ww.pdf [file burn051410.ww.pdf]

## Supplementary materials

**Figure S1: Number of PCCRC-3yr observed, and expected if the rate were reduced to 5.5% or 3.6% as achieved in the UK Bowel Cancer Screening Programme.**

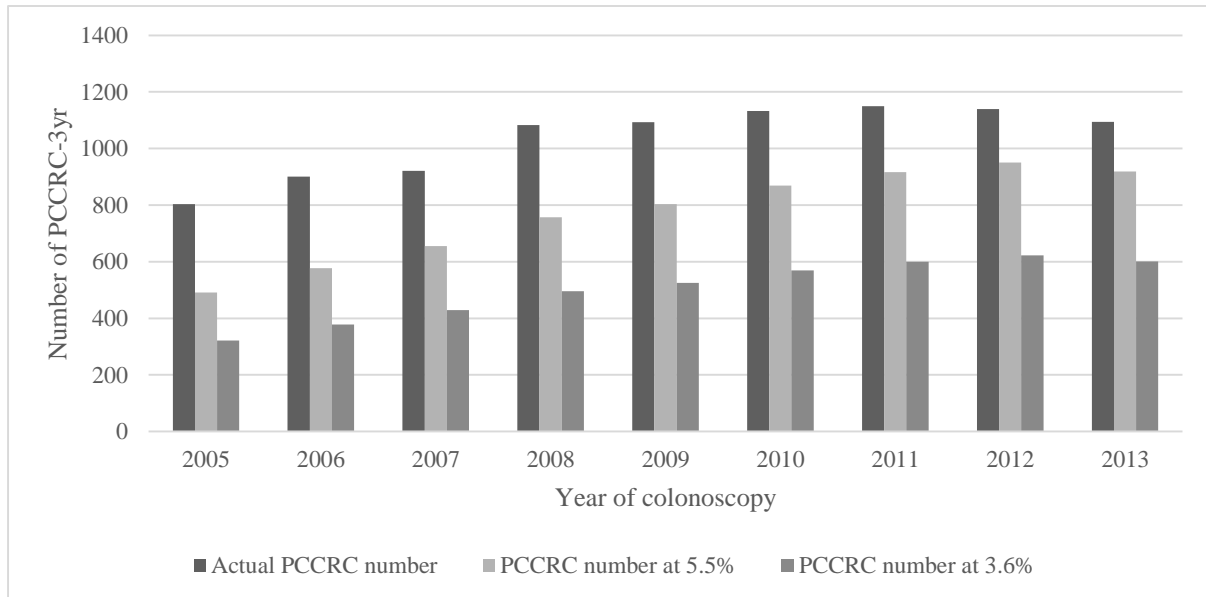

**Table S1: Percentiles showing the spread of the unadjusted PCCRC-3yr rate for each 3-year period.**

| <b>Percentile</b> | <b>PCCRC-3yr rate (%)</b> |                     |                     |
|-------------------|---------------------------|---------------------|---------------------|
|                   | <b>2005 to 2007</b>       | <b>2008 to 2010</b> | <b>2011 to 2013</b> |
| 1%                | 2.6                       | 3.3                 | 3.2                 |
| 5%                | 4.6                       | 4.7                 | 4.0                 |
| 10%               | 5.4                       | 4.9                 | 4.8                 |
| 25%               | 6.8                       | 6.0                 | 5.5                 |
| 50%               | 8.8                       | 7.4                 | 6.7                 |
| 75%               | 10.5                      | 9.1                 | 8.1                 |
| 90%               | 12.7                      | 11.9                | 9.1                 |
| 95%               | 16.3                      | 13.8                | 10.4                |
| 99%               | 28.6                      | 18.4                | 13.6                |

**Table S3. Change in the PCCRC-3yr rate for each provider from the earliest cohort (2005 to 2007) to the latest (2011 to 2013).**

|                                                          | Adjusted movement 2005<br>to 2013 |    | Unadjusted movement 2005<br>to 2013 |    |
|----------------------------------------------------------|-----------------------------------|----|-------------------------------------|----|
|                                                          | Number of<br>providers            | %  | Number of<br>providers              | %  |
| No change                                                | 25                                | 19 | 67                                  | 50 |
| No change or movement of one<br>quintile higher or lower | 75                                | 56 | 120                                 | 89 |
| 1 quintile lower PCCRC-3yr rate                          | 26                                | 19 | 32                                  | 24 |
| 2 quintiles lower PCCRC-3yr rate                         | 17                                | 13 | 6                                   | 4  |
| 3 quintiles lower PCCRC-3yr rate                         | 6                                 | 4  | 1                                   | 1  |
| 4 quintiles lower PCCRC-3yr rate                         | 6                                 | 4  | 0                                   | 0  |
| 1 quintile higher PCCRC-3yr rate                         | 24                                | 18 | 21                                  | 16 |
| 2 quintiles higher PCCRC-3yr rate                        | 18                                | 13 | 6                                   | 4  |
| 3 quintiles higher PCCRC-3yr rate                        | 9                                 | 7  | 2                                   | 1  |
| 4 quintiles higher PCCRC-3yr rate                        | 4                                 | 3  | 0                                   | 0  |
